# Supplementary material for: miR-494-3p Induces Cellular Senescence and Enhances Radiosensitivity in Human Oral Squamous Carcinoma Cells
Source: MDPI journal article supplement (doi:10.3390/ijms17071092), 2016-07-08
Supplement: s1 [file s1]

## Supplementary Materials: miR-494-3p Induces Cellular Senescence and Enhances Radiosensitivity in Human Oral Squamous Carcinoma Cells

Jui-Hung Weng, Cheng-Chia Yu, Yueh-Chun Lee, Cheng-Wei Lin, Wen-Wei Chang and Yu-Liang Kuo

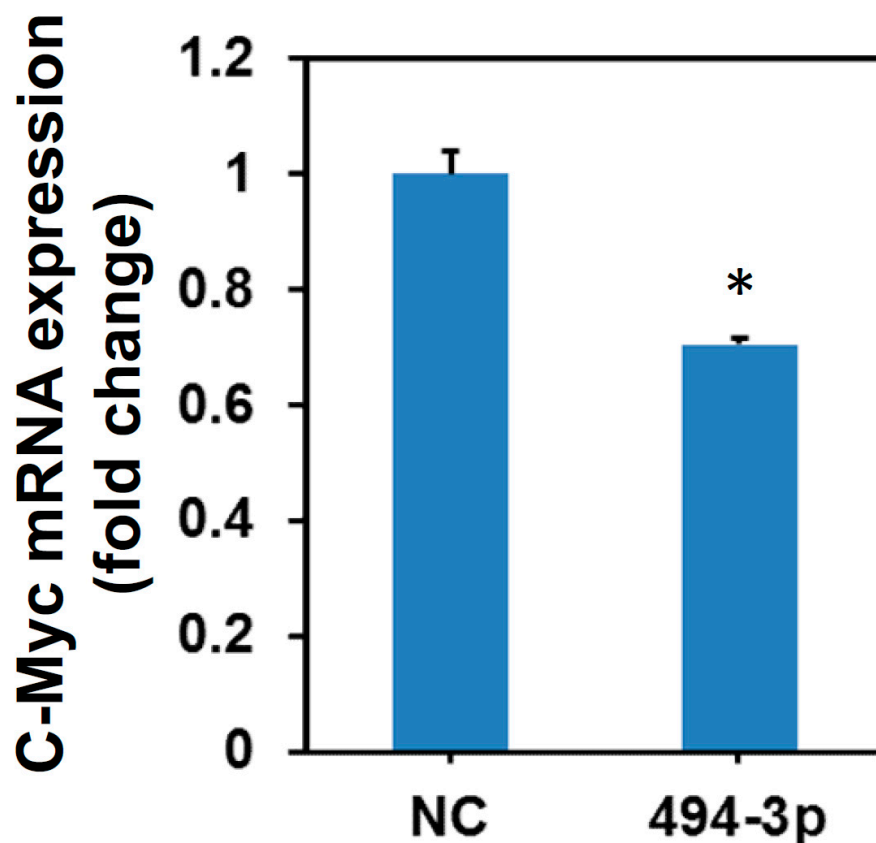

**Figure S1.** Overexpression of miR-494-3p downregulates c-Myc in SAS cells. Cells were transfected with 100 nM of negative control mimic (NC) or miR-494-3p mimic (494-3p) for 48 h. The expression of c-Myc was determined by qRT-PCR. \*,  $p < 0.05$ ; \*\*,  $p < 0.01$ .

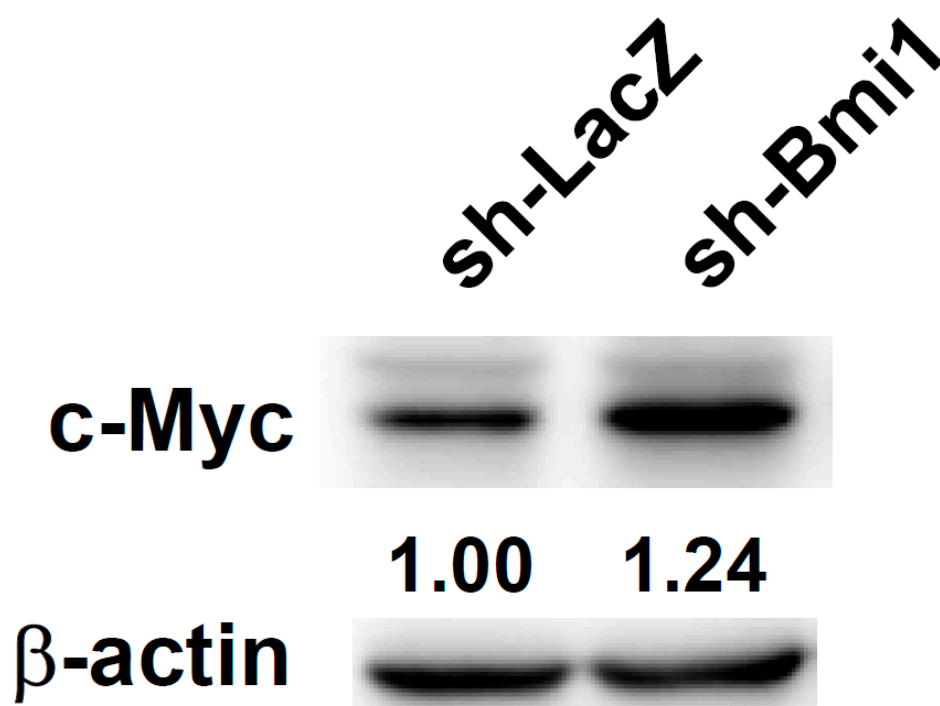

**Figure S2.** Knockdown of Bmi1 in SAS cells slightly increases c-Myc expression. Cells were transduced with lentivirus carrying sh-LacZ or sh-Bmi1 and selected with 2  $\mu$ g/mL puromycin for 3 days. The expression of c-Myc was determined by Western blot. The inserted numbers indicated relative expression levels as comparison with sh-LacZ group
